# Supplementary material
Source: PubMed Central journal article supplement (PMC8522798)
Supplement: NEJMoa2105290_disclosures.pdf [file NEJMoa2105290_disclosures.pdf]

**Disclosure Purpose:** 21-05290

**Summary of Interests**

I do not have any interests to disclose at this time.

**Additional Questions:**

- 1. **Are there other relationships or activities that readers could perceive to have influenced, or that give the appearance of potentially influencing, what you wrote in the submitted work?**  
No.
- 2. **What is the manuscript title?**  
Phase 3 Safety and Efficacy of AZD1222 (ChAdOx1 nCoV-19) COVID-19 Vaccine
- 3. **Are you the corresponding author?**  
No.

**Certification**

I certify that the information provided in this disclosure is complete and accurate.

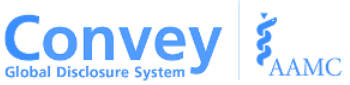

**Disclosure Purpose:** 21-05290

### Summary of Interests

I do not have any interests to disclose at this time.

### Additional Questions:

- Are there other relationships or activities that readers could perceive to have influenced, or that give the appearance of potentially influencing, what you wrote in the submitted work?**  
No.
- What is the manuscript title?**  
Phase 3 Safety and Efficacy of AZD1222 (ChAdOx1 nCoV-19) COVID-19 Vaccine
- Are you the corresponding author?**  
No.

### Certification

I certify that the information provided in this disclosure is complete and accurate.

**Disclosure Purpose:** 21-05290

**Summary of Interests**

I do not have any interests to disclose at this time.

**Additional Questions:**

- 1. **Are there other relationships or activities that readers could perceive to have influenced, or that give the appearance of potentially influencing, what you wrote in the submitted work?**  
No.
- 2. **What is the manuscript title?**  
Phase 3 Safety and Efficacy of AZD1222 (ChAdOx1 nCoV-19) COVID-19 Vaccine
- 3. **Are you the corresponding author?**  
No.

**Certification**

I certify that the information provided in this disclosure is complete and accurate.

**Disclosure Purpose:** 21-05290

### Summary of Interests

I do not have any interests to disclose at this time.

### Additional Questions:

- Are there other relationships or activities that readers could perceive to have influenced, or that give the appearance of potentially influencing, what you wrote in the submitted work?**  
No.
- What is the manuscript title?**  
Phase 3 Safety and Efficacy of AZD1222 (ChAdOx1 nCoV-19) COVID-19 Vaccine
- Are you the corresponding author?**  
No.

### Certification

I certify that the information provided in this disclosure is complete and accurate.

**Disclosure Purpose:** 21-05290

Summary of Interests

I do not have any interests to disclose at this time.

Additional Questions:

- 1. **Are there other relationships or activities that readers could perceive to have influenced, or that give the appearance of potentially influencing, what you wrote in the submitted work?**  
No.
- 2. **What is the manuscript title?**  
Phase 3 Safety and Efficacy of AZD1222(ChAdOx1.nCoV-19) COVID-19 Vaccine
- 3. **Are you the corresponding author?**  
No.

Certification

I certify that the information provided in this disclosure is complete and accurate.



**Disclosure Purpose:** 21-05290

**Summary of Interests**

I do not have any interests to disclose at this time.

**Additional Questions:**

- 1. **Are there other relationships or activities that readers could perceive to have influenced, or that give the appearance of potentially influencing, what you wrote in the submitted work?**  
No.
- 2. **What is the manuscript title?**  
AZD1222 US Phase 3
- 3. **Are you the corresponding author?**  
No.

**Certification**

I certify that the information provided in this disclosure is complete and accurate.

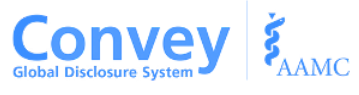

**Disclosure Purpose:** 21-05290

## Summary of Interests

| Company or Organization                                                                                         |                  |                                                                                 |
|-----------------------------------------------------------------------------------------------------------------|------------------|---------------------------------------------------------------------------------|
| Entity                                                                                                          | Type             | Interest Held By                                                                |
| National Institutes of Health                                                                                   | Grant / Contract | Self                                                                            |
| <i>Recipient Name:</i> Lawrence Corey<br><i>Grant / Contract Description:</i><br><i>Additional Information:</i> |                  | <i>Recipient Type:</i> Institution<br><i>Grant / Contract Purpose:</i> Research |

## Additional Questions:

- Are there other relationships or activities that readers could perceive to have influenced, or that give the appearance of potentially influencing, what you wrote in the submitted work?**  
No.
- What is the manuscript title?**  
Phase 3 Safety and Efficacy of AZD1222 (ChAdOx1 nCoV-19) COVID-19 Vaccine
- Are you the corresponding author?**  
No.

## Certification

I certify that the information provided in this disclosure is complete and accurate.

**Disclosure Purpose:** 21-05290

**Summary of Interests**

I do not have any interests to disclose at this time.

**Additional Questions:**

- 1. **Are there other relationships or activities that readers could perceive to have influenced, or that give the appearance of potentially influencing, what you wrote in the submitted work?**  
No.
- 2. **What is the manuscript title?**  
Phase 3 Safety and Efficacy of AZD1222 (ChAdOx1 nCoV-19) COVID-19 Vaccine
- 3. **Are you the corresponding author?**  
No.

**Certification**

I certify that the information provided in this disclosure is complete and accurate.



Disclosure Purpose: 21-05290

## Summary of Interests

## Company or Organization

| Entity                                                                                                                                                                              | Type             | Interest Held By                                                                |
|-------------------------------------------------------------------------------------------------------------------------------------------------------------------------------------|------------------|---------------------------------------------------------------------------------|
| Gilead Sciences                                                                                                                                                                     | Grant / Contract | Self                                                                            |
| <i>Recipient Name:</i> Lundquist Institute at Harbor-UCLA Medical Center<br><i>Grant / Contract Description:</i> Research of HIV-related products<br><i>Additional Information:</i> |                  | <i>Recipient Type:</i> Institution<br><i>Grant / Contract Purpose:</i> Research |
| Gilead Sciences                                                                                                                                                                     | Consultant       | Self                                                                            |
| <i>Category:</i> Consultant<br><i>Additional Information:</i> Part of independent panel of grant reviewers for a Gilead funding program.                                            |                  | <i>Description:</i> Consultant on HIV related products                          |
| Merck                                                                                                                                                                               | Consultant       | Self                                                                            |
| <i>Category:</i> Consultant<br><i>Additional Information:</i> Ad hoc consultant for HIV products                                                                                    |                  | <i>Description:</i>                                                             |
| ViiV Healthcare                                                                                                                                                                     | Grant / Contract | Self                                                                            |
| <i>Recipient Name:</i> Lundquist Institute at Harbor-UCLA Medical Center<br><i>Grant / Contract Description:</i> HIV related studies<br><i>Additional Information:</i>              |                  | <i>Recipient Type:</i> Institution<br><i>Grant / Contract Purpose:</i> Research |
| ViiV Healthcare                                                                                                                                                                     | Consultant       | Self                                                                            |
| <i>Category:</i> Consultant<br><i>Additional Information:</i> Ad hoc consultant                                                                                                     |                  | <i>Description:</i> Consultant for HIV-related products                         |

## Additional Questions:

- Are there other relationships or activities that readers could perceive to have influenced, or that give the appearance of potentially influencing, what you wrote in the submitted work?  
No.
- What is the manuscript title?  
Phase 3 Safety and Efficacy of AZD1222 (ChAdOx1 nCoV-19) COVID-19 Vaccine
- Are you the corresponding author?  
No.

## Certification

I certify that the information provided in this disclosure is complete and accurate.

Disclosure Purpose: 21-05290

## Summary of Interests

### Company or Organization

| Entity                                                                                                                                                                                             | Type             | Interest Held By                                                                |
|----------------------------------------------------------------------------------------------------------------------------------------------------------------------------------------------------|------------------|---------------------------------------------------------------------------------|
| <a href="#">AstraZeneca</a>                                                                                                                                                                        | Grant / Contract | Self                                                                            |
| <i>Recipient Name:</i> Orlando Immunology Center<br><i>Grant / Contract Description:</i> Conduction of COVID research studies<br><i>Additional Information:</i>                                    |                  | <i>Recipient Type:</i> Institution<br><i>Grant / Contract Purpose:</i> Research |
| <a href="#">Boehringer Ingelheim</a>                                                                                                                                                               | Grant / Contract | Self                                                                            |
| <i>Recipient Name:</i> Orlando Immunology Center<br><i>Grant / Contract Description:</i> Conduction of COVID research studies<br><i>Additional Information:</i>                                    |                  | <i>Recipient Type:</i> Institution<br><i>Grant / Contract Purpose:</i> Research |
| <a href="#">F. Hoffmann-La Roche</a>                                                                                                                                                               | Grant / Contract | Self                                                                            |
| <i>Recipient Name:</i> Orlando Immunology Center<br><i>Grant / Contract Description:</i> Conduction of COVID research studies<br><i>Additional Information:</i>                                    |                  | <i>Recipient Type:</i> Institution<br><i>Grant / Contract Purpose:</i> Research |
| <a href="#">Gilead Sciences</a>                                                                                                                                                                    | Consultant       | Self                                                                            |
| <i>Category:</i> Consultant<br><i>Additional Information:</i> Twice yearly meetings                                                                                                                |                  | <i>Description:</i> HIV National Advisory Board                                 |
| <a href="#">Gilead Sciences Inc</a>                                                                                                                                                                | Grant / Contract | Self                                                                            |
| <i>Recipient Name:</i> Orlando Immunology Center<br><i>Grant / Contract Description:</i> Conduction of HIV and HCV clinical research studies and research grants<br><i>Additional Information:</i> |                  | <i>Recipient Type:</i> Institution<br><i>Grant / Contract Purpose:</i> Research |
| <a href="#">GlaxoSmithKline, LLC.</a>                                                                                                                                                              | Grant / Contract | Self                                                                            |
| <i>Recipient Name:</i> Orlando Immunology Center<br><i>Grant / Contract Description:</i> Conduction of HIV and COVID research studies<br><i>Additional Information:</i>                            |                  | <i>Recipient Type:</i> Institution<br><i>Grant / Contract Purpose:</i> Research |
| <a href="#">Johnson &amp; Johnson Health Care Systems Inc.</a>                                                                                                                                     | Grant / Contract | Self                                                                            |
| <i>Recipient Name:</i> Orlando Immunology Center<br><i>Grant / Contract Description:</i> Conduction of COVID research studies<br><i>Additional Information:</i>                                    |                  | <i>Recipient Type:</i> Institution<br><i>Grant / Contract Purpose:</i> Research |
| <a href="#">National Institute of Allergy and Infectious Diseases</a>                                                                                                                              | Grant / Contract | Self                                                                            |
| <i>Recipient Name:</i> Orlando Immunology Center<br><i>Grant / Contract Description:</i> Conduction of HIV and COVID Clinical Research Trials<br><i>Additional Information:</i>                    |                  | <i>Recipient Type:</i> Institution<br><i>Grant / Contract Purpose:</i> Research |
| <a href="#">Regeneron Pharmaceuticals</a>                                                                                                                                                          | Grant / Contract | Self                                                                            |
| <i>Recipient Name:</i> Orlando Immunology Center<br><i>Grant / Contract Description:</i> Conduction of COVID research studies<br><i>Additional Information:</i>                                    |                  | <i>Recipient Type:</i> Institution<br><i>Grant / Contract Purpose:</i> Research |

### Additional Questions:

- Are there other relationships or activities that readers could perceive to have influenced, or that give the appearance of potentially influencing, what you wrote in the submitted work?  
No.
- What is the manuscript title?  
Phase 3 Safety and Efficacy of AZD1222 (ChAdOx1 nCoV-19) COVID-19Vaccine
- Are you the corresponding author?  
No.

Certification

I certify that the information provided in this disclosure is complete and accurate.

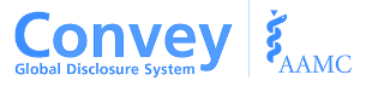

# Anna Durbin

Disclosure Purpose: 21-05290

## Summary of Interests

### Company or Organization

| Entity                                                                                                                                                                            | Type             | Interest Held By                                                                                                                                   |
|-----------------------------------------------------------------------------------------------------------------------------------------------------------------------------------|------------------|----------------------------------------------------------------------------------------------------------------------------------------------------|
| <a href="#">Fred Hutchinson Cancer Research Center</a>                                                                                                                            | Grant / Contract | Other - AstraZeneca                                                                                                                                |
| <i>Recipient Name:</i> Johns Hopkins University<br><i>Grant / Contract Description:</i> Conduct of the Phase 3 clinical trial of the safety and efficacy of ChAdOx1 Covid vaccine |                  | <i>Recipient Type:</i> Institution<br><i>Grant / Contract Purpose:</i> Research<br><i>Additional Information:</i> I was the site PI for this trial |
| <a href="#">Merck</a>                                                                                                                                                             | Consultant       | Self                                                                                                                                               |
| <i>Category:</i> Consultant<br><i>Additional Information:</i> I consult with Merck for approximately 24 hours a year                                                              |                  | <i>Description:</i> I provided expertise for Merck's dengue vaccine development program                                                            |
| <a href="#">Pfizer</a>                                                                                                                                                            | Grant / Contract | Other - Pfizer                                                                                                                                     |
| <i>Recipient Name:</i> Johns Hopkins University<br><i>Grant / Contract Description:</i> Phase 3 evaluation of the safety and efficacy of the BNT162b2 COVID vaccine               |                  | <i>Recipient Type:</i> Institution<br><i>Grant / Contract Purpose:</i> Research<br><i>Additional Information:</i> Investigator                     |
| <a href="#">Valneva Austria GmbH</a>                                                                                                                                              | Consultant       | Self                                                                                                                                               |
| <i>Category:</i> Consultant<br><i>Additional Information:</i> I provide expertise for their vaccine development program. This includes a vaccine for COVID.                       |                  | <i>Description:</i> I am on the scientific advisory board for Valneva                                                                              |

## Additional Questions:

- Are there other relationships or activities that readers could perceive to have influenced, or that give the appearance of potentially influencing, what you wrote in the submitted work?**

Yes.

  - Please describe those relationships.**

The National Institutes of Health provided funding to my institution for the conduct of the trial.
- What is the manuscript title?**

Phase 3 Safety and Efficacy of AZD1222 (ChAdOx1 nCoV-19) COVID-19 Vaccine
- Are you the corresponding author?**

No.

## Certification

I certify that the information provided in this disclosure is complete and accurate.

Disclosure Purpose: 21-05290

## Summary of Interests

### Company or Organization

| Entity                                                                                                                                                                  | Type                       | Interest Held By                                                                |
|-------------------------------------------------------------------------------------------------------------------------------------------------------------------------|----------------------------|---------------------------------------------------------------------------------|
| <a href="#">BioFire Diagnostics, LLC</a>                                                                                                                                | Grant / Contract           | Self                                                                            |
| <i>Recipient Name:</i> University of Rochester<br><i>Grant / Contract Description:</i> Improved diagnostics for respiratory infection<br><i>Additional Information:</i> |                            | <i>Recipient Type:</i> Institution<br><i>Grant / Contract Purpose:</i> Research |
| <a href="#">Janssen Biotech</a>                                                                                                                                         | Grant / Contract           | Self                                                                            |
| <i>Recipient Name:</i> University of Rochester<br><i>Grant / Contract Description:</i> Vaccine and Epidemiology<br><i>Additional Information:</i>                       |                            | <i>Recipient Type:</i> Institution<br><i>Grant / Contract Purpose:</i> Research |
| <a href="#">Merck</a>                                                                                                                                                   | Grant / Contract           | Self                                                                            |
| <i>Recipient Name:</i> University of Rochester<br><i>Grant / Contract Description:</i> Epidemiology of RSV<br><i>Additional Information:</i>                            |                            | <i>Recipient Type:</i> Institution<br><i>Grant / Contract Purpose:</i> Research |
| <a href="#">Novavax</a>                                                                                                                                                 | Data And Safety Monitoring | Self                                                                            |
| <i>Category:</i> Data And Safety Monitoring<br><i>Additional Information:</i>                                                                                           |                            | <i>Description:</i> COVID Vaccine DSMB                                          |
| <a href="#">Pfizer</a>                                                                                                                                                  | Grant / Contract           | Self                                                                            |
| <i>Recipient Name:</i> University of Rochester<br><i>Grant / Contract Description:</i> Vaccine Trial<br><i>Additional Information:</i>                                  |                            | <i>Recipient Type:</i> Institution<br><i>Grant / Contract Purpose:</i> Research |

### Additional Questions:

- Are there other relationships or activities that readers could perceive to have influenced, or that give the appearance of potentially influencing, what you wrote in the submitted work?  
No.
- What is the manuscript title?  
Phase 3 Safety and Efficacy of AZD1222 (ChAdOx1 nCoV-19) COVID-19 Vaccine
- Are you the corresponding author?  
No.

### Certification

I certify that the information provided in this disclosure is complete and accurate.

**Disclosure Purpose:** 21-05290

## Summary of Interests

| Company or Organization                                              |            |                                                   |
|----------------------------------------------------------------------|------------|---------------------------------------------------|
| Entity                                                               | Type       | Interest Held By                                  |
| <a href="#">AstraZeneca</a>                                          | Employment | Self                                              |
| <i>Title:</i> Global Clinical Head<br><i>Additional Information:</i> |            | <i>Position Description:</i> Clinical Development |
| <a href="#">AstraZeneca</a>                                          | Stock      | Self                                              |
| <i>Additional Information:</i>                                       |            |                                                   |

## Additional Questions:

- Are there other relationships or activities that readers could perceive to have influenced, or that give the appearance of potentially influencing, what you wrote in the submitted work?**  
No.
- What is the manuscript title?**  
Phase 3 Safety and Efficacy of AZD1222 (ChAdOx1 nCoV-19) COVID-19 Vaccine
- Are you the corresponding author?**  
No.

## Certification

I certify that the information provided in this disclosure is complete and accurate.

**Disclosure Purpose:** 21-05290

## Summary of Interests

| Company or Organization                                              |            |                              |
|----------------------------------------------------------------------|------------|------------------------------|
| Entity                                                               | Type       | Interest Held By             |
| <a href="#">AstraZeneca</a>                                          | Employment | Self                         |
| <i>Title:</i> Global Clinical Head<br><i>Additional Information:</i> |            | <i>Position Description:</i> |

## Additional Questions:

- Are there other relationships or activities that readers could perceive to have influenced, or that give the appearance of potentially influencing, what you wrote in the submitted work?**  
No.
- What is the manuscript title?**  
Phase 3 Safety and Efficacy of AZD1222 (ChAdOx1 nCoV-19) COVID-19 Vaccine
- Are you the corresponding author?**  
No.

## Certification

I certify that the information provided in this disclosure is complete and accurate.

**Disclosure Purpose:** 21-05290

Summary of Interests

I do not have any interests to disclose at this time.

Additional Questions:

- 1. **Are there other relationships or activities that readers could perceive to have influenced, or that give the appearance of potentially influencing, what you wrote in the submitted work?**  
No.
- 2. **What is the manuscript title?**  
Phase 3 Safety and Efficacy of AZD1222 (ChAdOx1 nCoV-19) COVID-19 Vaccine
- 3. **Are you the corresponding author?**  
No.

Certification

I certify that the information provided in this disclosure is complete and accurate.





**Disclosure Purpose:** 21-05290

**Summary of Interests**

I do not have any interests to disclose at this time.

**Additional Questions:**

- 1. **Are there other relationships or activities that readers could perceive to have influenced, or that give the appearance of potentially influencing, what you wrote in the submitted work?**  
No.
- 2. **What is the manuscript title?**  
Phase 3 Safety and Efficacy of AZD1222 (ChAdOx1 nCoV-19) COVID-19 Vaccine
- 3. **Are you the corresponding author?**  
No.

**Certification**

I certify that the information provided in this disclosure is complete and accurate.



Disclosure Purpose: 21-05290

Summary of Interests

**Company or Organization**

| Entity                                                                               | Type  | Interest Held By                   |
|--------------------------------------------------------------------------------------|-------|------------------------------------|
| <a href="#">AstraZeneca</a>                                                          | Other | Other - Hassman Research Institute |
| <i>Category: Other</i><br><i>Additional Information: Clinical Trial Investigator</i> |       | <i>Description: Clinical Trial</i> |
| <a href="#">janssen vaccines and prevention B.V.</a>                                 | Other | Other - Hassman Research Institute |
| <i>Category: Other</i><br><i>Additional Information: Clinical Trial Investigator</i> |       | <i>Description: Clinical Trial</i> |
| <a href="#">Medicago</a>                                                             | Other | Other - Hassman Research Institute |
| <i>Category: Other</i><br><i>Additional Information: Clinical Trial Investigator</i> |       | <i>Description: Clinical Trial</i> |

Additional Questions:

- Are there other relationships or activities that readers could perceive to have influenced, or that give the appearance of potentially influencing, what you wrote in the submitted work?**  
No.
- What is the manuscript title?**  
Phase 3 Safety and Efficacy of AZD1222 (ChAdOx1 nCoV-19) COVID-19 Vaccine
- Are you the corresponding author?**  
No.

Certification

I certify that the information provided in this disclosure is complete and accurate.

Disclosure Purpose: 21-05290

Summary of Interests

**Company or Organization**

| Entity                                                                         | Type       | Interest Held By                                      |
|--------------------------------------------------------------------------------|------------|-------------------------------------------------------|
| AstraZeneca                                                                    | Employment | Self                                                  |
| <i>Title:</i> Executive Director, Statistics<br><i>Additional Information:</i> |            | <i>Position Description:</i> Biometrics Strategy Lead |
| AstraZeneca                                                                    | Stock      | Self                                                  |
| <i>Additional Information:</i>                                                 |            |                                                       |

Additional Questions:

- Are there other relationships or activities that readers could perceive to have influenced, or that give the appearance of potentially influencing, what you wrote in the submitted work?**  
No.
- What is the manuscript title?**  
Phase 3 Safety and Efficacy of AZD1222 (ChAdOx1 nCoV-19) COVID-19 Vaccine
- Are you the corresponding author?**  
No.

Certification

I certify that the information provided in this disclosure is complete and accurate.

**Disclosure Purpose:** 21-05290

**Summary of Interests**

I do not have any interests to disclose at this time.

**Additional Questions:**

- 1. **Are there other relationships or activities that readers could perceive to have influenced, or that give the appearance of potentially influencing, what you wrote in the submitted work?**  
No.
- 2. **What is the manuscript title?**  
Phase 3 Safety and Efficacy of AZD1222 (ChAdOx1 nCoV-19) COVID-19 Vaccine
- 3. **Are you the corresponding author?**  
No.

**Certification**

I certify that the information provided in this disclosure is complete and accurate.

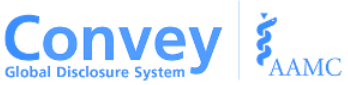

**Disclosure Purpose:** 21-05290

**Summary of Interests**

I do not have any interests to disclose at this time.

**Additional Questions:**

- 1. **Are there other relationships or activities that readers could perceive to have influenced, or that give the appearance of potentially influencing, what you wrote in the submitted work?**  
No.
- 2. **What is the manuscript title?**  
Phase 3 Safety and Efficacy of AZD1222 (ChAdOx1 nCoV-19) COVID-19 Vaccine
- 3. **Are you the corresponding author?**  
No.

**Certification**

I certify that the information provided in this disclosure is complete and accurate.



**Disclosure Purpose:** 21-05290

### Summary of Interests

I do not have any interests to disclose at this time.

### Additional Questions:

- Are there other relationships or activities that readers could perceive to have influenced, or that give the appearance of potentially influencing, what you wrote in the submitted work?**  
No.
- What is the manuscript title?**  
Phase 3 Safety and Efficacy of AZD1222 (ChAdOx1 nCoV-19) COVID-19 Vaccine
- Are you the corresponding author?**  
No.

### Certification

I certify that the information provided in this disclosure is complete and accurate.

**Disclosure Purpose:** 21-05290

## Summary of Interests

| Company or Organization                                                                        |            |                                                        |
|------------------------------------------------------------------------------------------------|------------|--------------------------------------------------------|
| Entity                                                                                         | Type       | Interest Held By                                       |
| AstraZeneca                                                                                    | Employment | Self                                                   |
| <i>Title:</i> Director, Clinical Virology<br><i>Additional Information:</i> Full time employee |            | <i>Position Description:</i> Head of clinical virology |
| AstraZeneca                                                                                    | Stock      | Self                                                   |
| <i>Additional Information:</i>                                                                 |            |                                                        |

## Additional Questions:

- Are there other relationships or activities that readers could perceive to have influenced, or that give the appearance of potentially influencing, what you wrote in the submitted work?**  
No.
- What is the manuscript title?**  
Phase 3 Safety and Efficacy of AZD1222 (ChAdOx1 nCoV-19) COVID-19 Vaccine
- Are you the corresponding author?**  
No.

## Certification

I certify that the information provided in this disclosure is complete and accurate.

**Disclosure Purpose:** 21-05290

### Summary of Interests

I do not have any interests to disclose at this time.

### Additional Questions:

- Are there other relationships or activities that readers could perceive to have influenced, or that give the appearance of potentially influencing, what you wrote in the submitted work?**  
No.
- What is the manuscript title?**  
Phase 3 Safety and Efficacy of AZD1222 (ChAdOx1 nCoV-19) COVID-19 Vaccine
- Are you the corresponding author?**  
No.

### Certification

I certify that the information provided in this disclosure is complete and accurate.



**Disclosure Purpose:** 21-05290

**Summary of Interests**

I do not have any interests to disclose at this time.

**Additional Questions:**

- 1. **Are there other relationships or activities that readers could perceive to have influenced, or that give the appearance of potentially influencing, what you wrote in the submitted work?**  
No.
- 2. **What is the manuscript title?**  
Phase 3 Safety and Efficacy of AZD1222 (ChAdOx1 nCoV-19) COVID-19 Vaccine
- 3. **Are you the corresponding author?**  
No.

**Certification**

I certify that the information provided in this disclosure is complete and accurate.



Disclosure Purpose: 21-05290

Summary of Interests

**Company or Organization**

| Entity      | Type             | Interest Held By |
|-------------|------------------|------------------|
| AstraZeneca | Grant / Contract | Self             |

*Recipient Name:* UC Regents  
*Grant / Contract Description:* Phase 3 RCT of AZD1222 vs. placebo for prevention of COVID-19  
*Additional Information:*

*Recipient Type:* Institution  
*Grant / Contract Purpose:* Research

Additional Questions:

- Are there other relationships or activities that readers could perceive to have influenced, or that give the appearance of potentially influencing, what you wrote in the submitted work?  
No.
- What is the manuscript title?  
Phase 3 Safety and Efficacy of AZD1222 (ChAdOx1 nCoV-19) COVID-19 Vaccine
- Are you the corresponding author?  
No.

Certification

I certify that the information provided in this disclosure is complete and accurate.

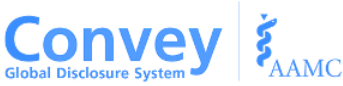

Disclosure Purpose: 21-05290

Summary of Interests

**Company or Organization**

| Entity                                                                                     | Type       | Interest Held By             |
|--------------------------------------------------------------------------------------------|------------|------------------------------|
| AstraZeneca                                                                                | Employment | Self                         |
| <i>Title:</i> Senior Global Development Medical Director<br><i>Additional Information:</i> |            | <i>Position Description:</i> |
| AstraZeneca                                                                                | Employment | Spouse/Partner               |
| <i>Title:</i> Senior Global Development Medical Director<br><i>Additional Information:</i> |            | <i>Position Description:</i> |
| AstraZeneca                                                                                | Stock      | Self                         |
| <i>Additional Information:</i>                                                             |            |                              |
| AstraZeneca                                                                                | Stock      | Spouse/Partner               |
| <i>Additional Information:</i>                                                             |            |                              |

Additional Questions:

- Are there other relationships or activities that readers could perceive to have influenced, or that give the appearance of potentially influencing, what you wrote in the submitted work?**  
No.
- What is the manuscript title?**  
Phase 3 Safety and Efficacy of AZD1222 (ChAdOx1 nCoV-19) COVID-19 Vaccine
- Are you the corresponding author?**  
No.

Certification

I certify that the information provided in this disclosure is complete and accurate.

**Disclosure Purpose:** 21-05290

## Summary of Interests

| Company or Organization                  |            |                                                                                                            |
|------------------------------------------|------------|------------------------------------------------------------------------------------------------------------|
| Entity                                   | Type       | Interest Held By                                                                                           |
| <a href="#">AstraZeneca</a>              | Employment | Self                                                                                                       |
| <i>Title:</i> Senior Vice President, R&D |            | <i>Position Description:</i> Head of late phase drug development for Respiratory, Immunology and Infection |
| <i>Additional Information:</i>           |            |                                                                                                            |

## Additional Questions:

- Are there other relationships or activities that readers could perceive to have influenced, or that give the appearance of potentially influencing, what you wrote in the submitted work?**  
No.
- What is the manuscript title?**  
Phase 3 Safety and Efficacy of AZD1222 (ChAdOx1 nCoV-19) COVID-19 Vaccine
- Are you the corresponding author?**  
No.

## Certification

I certify that the information provided in this disclosure is complete and accurate.

Disclosure Purpose: 21-05290

Summary of Interests

**Company or Organization**

| Entity                                                                                      | Type  | Interest Held By                                                                         |
|---------------------------------------------------------------------------------------------|-------|------------------------------------------------------------------------------------------|
| AstraZeneca                                                                                 | Other | Other - HealthPartners Institute                                                         |
| <i>Category:</i> Other<br><i>Additional Information:</i> Site PI for AZD1222 vaccine trial. |       | <i>Description:</i> Research Grant support to HealthPartners Institute for current trial |

Additional Questions:

- Are there other relationships or activities that readers could perceive to have influenced, or that give the appearance of potentially influencing, what you wrote in the submitted work?  
No.
- What is the manuscript title?  
Phase 3 Safety and Efficacy of AZD1222 (ChAdOx1 nCoV-19) COVID-19 Vaccine
- Are you the corresponding author?  
No.

Certification

I certify that the information provided in this disclosure is complete and accurate.

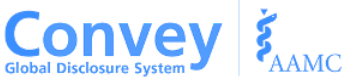

Disclosure Purpose: 21-05290

## Summary of Interests

| Company or Organization                                                   |            |                                                 |
|---------------------------------------------------------------------------|------------|-------------------------------------------------|
| Entity                                                                    | Type       | Interest Held By                                |
| AstraZeneca                                                               | Employment | Self                                            |
| <i>Title:</i> Senior Director Scientist<br><i>Additional Information:</i> |            | <i>Position Description:</i> Clinical Scientist |
| AstraZeneca                                                               | Stock      | Self                                            |
| <i>Additional Information:</i>                                            |            |                                                 |

## Additional Questions:

- Are there other relationships or activities that readers could perceive to have influenced, or that give the appearance of potentially influencing, what you wrote in the submitted work?**  
No.
- What is the manuscript title?**  
Phase 3 Safety and Efficacy of AZD1222 (ChAdOx1 nCoV-19) COVID-19 Vaccine
- Are you the corresponding author?**  
No.

## Certification

I certify that the information provided in this disclosure is complete and accurate.

Disclosure Purpose: 21-05290

## Summary of Interests

### Company or Organization

| Entity                                                                                                                                                                                                                         | Type             | Interest Held By                                                                |
|--------------------------------------------------------------------------------------------------------------------------------------------------------------------------------------------------------------------------------|------------------|---------------------------------------------------------------------------------|
| <a href="#">Eli Lilly and Company</a>                                                                                                                                                                                          | Grant / Contract | Self                                                                            |
| <i>Recipient Name:</i> Mark J. Mulligan MD FIDSA<br><i>Grant / Contract Description:</i> clinical research; laboratory research<br><i>Additional Information:</i>                                                              |                  | <i>Recipient Type:</i> Institution<br><i>Grant / Contract Purpose:</i> Research |
| <a href="#">meissa vaccines</a>                                                                                                                                                                                                | Consultant       | Self                                                                            |
| <i>Category:</i> Consultant<br><i>Additional Information:</i> relating to covid vaccine development                                                                                                                            |                  | <i>Description:</i> scientific advisory board                                   |
| <a href="#">Pfizer</a>                                                                                                                                                                                                         | Grant / Contract | Self                                                                            |
| <i>Recipient Name:</i> Mark Mulligan<br><i>Grant / Contract Description:</i> Pfizer Covid vaccines clinical trials<br><i>Additional Information:</i> research contract to NYU; i also serve on the Pfizer covid advisory board |                  | <i>Recipient Type:</i> Institution<br><i>Grant / Contract Purpose:</i> Research |
| <a href="#">SANOFI PASTEUR INC.</a>                                                                                                                                                                                            | Grant / Contract | Self                                                                            |
| <i>Recipient Name:</i> Mark J. Mulligan MD FIDSA<br><i>Grant / Contract Description:</i> vaccine trials<br><i>Additional Information:</i>                                                                                      |                  | <i>Recipient Type:</i> Institution<br><i>Grant / Contract Purpose:</i> Research |

### Additional Questions:

- Are there other relationships or activities that readers could perceive to have influenced, or that give the appearance of potentially influencing, what you wrote in the submitted work?  
No.
- What is the manuscript title?  
Phase 3 Safety and Efficacy of AZD1222 (ChAdOx1 nCoV-19) COVID-19 Vaccine
- Are you the corresponding author?  
No.

### Certification

I certify that the information provided in this disclosure is complete and accurate.

**Disclosure Purpose:** 21-05290

Summary of Interests

I do not have any interests to disclose at this time.

Additional Questions:

- 1. **Are there other relationships or activities that readers could perceive to have influenced, or that give the appearance of potentially influencing, what you wrote in the submitted work?**  
No.
- 2. **What is the manuscript title?**  
Phase 3 Safety and Efficacy of AZD1222 (ChAdOx1 nCoV-19) COVID-19 Vaccine
- 3. **Are you the corresponding author?**  
No.

Certification

I certify that the information provided in this disclosure is complete and accurate.

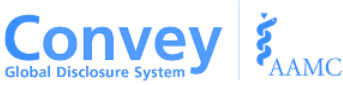



**Disclosure Purpose:** 21-05290

## Summary of Interests

| Company or Organization                                                                                                                                                                                                                                              |                  |                                                                                |
|----------------------------------------------------------------------------------------------------------------------------------------------------------------------------------------------------------------------------------------------------------------------|------------------|--------------------------------------------------------------------------------|
| Entity                                                                                                                                                                                                                                                               | Type             | Interest Held By                                                               |
| Pfizer                                                                                                                                                                                                                                                               | Grant / Contract | Self                                                                           |
| <i>Recipient Name:</i> Kathleen Neuzil<br><i>Grant / Contract Description:</i> Phase I Clinical trial of mRNA vaccine candidate<br><i>Additional Information:</i> Dr. Neuzil received no salary support. Her institution received support for conduct of this trial. |                  | <i>Recipient Type:</i> Individual<br><i>Grant / Contract Purpose:</i> Research |

## Additional Questions:

- Are there other relationships or activities that readers could perceive to have influenced, or that give the appearance of potentially influencing, what you wrote in the submitted work?**  
No.
- What is the manuscript title?**  
Phase 3 safety and efficacy of AZD1222 (ChAdOx1 nCoV-19) COVID-19 Vaccine
- Are you the corresponding author?**  
No.

## Certification

I certify that the information provided in this disclosure is complete and accurate.

Disclosure Purpose: 21-05290

## Summary of Interests

### Company or Organization

| Entity                                                                                                                                                                      | Type  | Interest Held By                                              |
|-----------------------------------------------------------------------------------------------------------------------------------------------------------------------------|-------|---------------------------------------------------------------|
| <a href="#">Gilead Sciences Inc</a>                                                                                                                                         | Other | Self                                                          |
| <i>Category:</i> Other<br><i>Additional Information:</i> PI for LEN PrEP study                                                                                              |       | <i>Description:</i> Principal Investigator for clinical trial |
| <a href="#">ViiV Healthcare</a>                                                                                                                                             | Other | Self                                                          |
| <i>Category:</i> Other<br><i>Additional Information:</i> Served on Advisory Board for 1 day in the past year. Have served on ViiV advisory boards in previous years as well |       | <i>Description:</i> Served on Advisory Board                  |

## Additional Questions:

- Are there other relationships or activities that readers could perceive to have influenced, or that give the appearance of potentially influencing, what you wrote in the submitted work?**  
No.
- What is the manuscript title?**  
Phase 3 Safety and Efficacy of AZD1222 (ChAdOx1 nCoV-19) COVID-19 Vaccine
- Are you the corresponding author?**  
No.

## Certification

I certify that the information provided in this disclosure is complete and accurate.

Disclosure Purpose: 21-05290

## Summary of Interests

### Company or Organization

| Entity                                                                                                                                                                                          | Type       | Interest Held By                                                                                              |
|-------------------------------------------------------------------------------------------------------------------------------------------------------------------------------------------------|------------|---------------------------------------------------------------------------------------------------------------|
| <a href="#">Merck</a>                                                                                                                                                                           | Consultant | Self                                                                                                          |
| <b>Category:</b> Consultant<br><b>Additional Information:</b> Presented and participated at forum                                                                                               |            | <b>Description:</b> service on US Vaccine Confidence Expert Input Forum                                       |
| <a href="#">Pfizer</a>                                                                                                                                                                          | Consultant | Self                                                                                                          |
| <b>Category:</b> Consultant<br><b>Additional Information:</b> Limited time Consultant for topic specific broadcast                                                                              |            | <b>Description:</b> Consultant for Spring 2021 Trumenba Premiere Broadcast                                    |
| <a href="#">Pfizer</a>                                                                                                                                                                          | Consultant | Self                                                                                                          |
| <b>Category:</b> Consultant<br><b>Additional Information:</b> Time limited consultant for topic specific activity                                                                               |            | <b>Description:</b> Consultant for Pediatric Pneumococcal PEGASUS                                             |
| <a href="#">Pfizer</a>                                                                                                                                                                          | Consultant | Self                                                                                                          |
| <b>Category:</b> Consultant<br><b>Additional Information:</b> limited time consultant for topic specific story                                                                                  |            | <b>Description:</b> Consultant for Trumenba Science Story                                                     |
| <a href="#">Pfizer</a>                                                                                                                                                                          | Consultant | Self                                                                                                          |
| <b>Category:</b> Consultant<br><b>Additional Information:</b> Consultant for one time meeting on topic specific discussion                                                                      |            | <b>Description:</b> Consultant for Virtual Discussion about future pediatric PCV recommendations in the US    |
| <a href="#">SANOFI PASTEUR INC.</a>                                                                                                                                                             | Consultant | Self                                                                                                          |
| <b>Category:</b> Consultant<br><b>Additional Information:</b> limited time scientific/vaccine consultant for the production of educational videos to support HCPs in managing vaccine hesitancy |            | <b>Description:</b> Scientific consultant & Medical Expert                                                    |
| <a href="#">SANOFI PASTEUR INC.</a>                                                                                                                                                             | Consultant | Self                                                                                                          |
| <b>Category:</b> Consultant<br><b>Additional Information:</b> Served as speaker to healthcare professionals on topics specific to vaccines & vaccine hesitancy                                  |            | <b>Description:</b> provided presentations as requested                                                       |
| <a href="#">SANOFI PASTEUR INC.</a>                                                                                                                                                             | Consultant | Self                                                                                                          |
| <b>Category:</b> Consultant<br><b>Additional Information:</b> Hotel and flight was booked by the funder                                                                                         |            | <b>Description:</b> Presented at the International Forum Voices for Vaccination on 8/29/19 in Mexico City, MX |

### Additional Questions:

- Are there other relationships or activities that readers could perceive to have influenced, or that give the appearance of potentially influencing, what you wrote in the submitted work?  
No.
- What is the manuscript title?  
Phase 3 Safety and Efficacy of AZD1222 (ChAdOx1 nCoV-19) COVID-19 Vaccine
- Are you the corresponding author?  
No.

### Certification

I certify that the information provided in this disclosure is complete and accurate.



**Disclosure Purpose:** 21-05290

## Summary of Interests

| Company or Organization                                                  |            |                                                                   |
|--------------------------------------------------------------------------|------------|-------------------------------------------------------------------|
| Entity                                                                   | Type       | Interest Held By                                                  |
| <a href="#">AstraZeneca</a>                                              | Employment | Self                                                              |
| <i>Title:</i> Executive Vice President<br><i>Additional Information:</i> |            | <i>Position Description:</i> Global Head of BioPharmaceutical R&D |
| <a href="#">AstraZeneca</a>                                              | Stock      | Self                                                              |
| <i>Additional Information:</i>                                           |            |                                                                   |
| <a href="#">GlaxoSmithKline</a>                                          | Stock      | Self                                                              |
| <i>Additional Information:</i>                                           |            |                                                                   |
| <a href="#">Johnson and Johnson</a>                                      | Stock      | Self                                                              |
| <i>Additional Information:</i>                                           |            |                                                                   |

## Additional Questions:

- Are there other relationships or activities that readers could perceive to have influenced, or that give the appearance of potentially influencing, what you wrote in the submitted work?**  
No.
- What is the manuscript title?**  
Phase 3 Safety and Efficacy of AZD1222 (ChAdOx1 nCoV-19) COVID-19 Vaccine
- Are you the corresponding author?**  
No.

## Certification

I certify that the information provided in this disclosure is complete and accurate.

**Disclosure Purpose:** 21-05290

**Summary of Interests**

I do not have any interests to disclose at this time.

**Additional Questions:**

- 1. **Are there other relationships or activities that readers could perceive to have influenced, or that give the appearance of potentially influencing, what you wrote in the submitted work?**  
No.
- 2. **What is the manuscript title?**  
phase3 safety and efficacy of AZD 1222
- 3. **Are you the corresponding author?**  
No.

**Certification**

I certify that the information provided in this disclosure is complete and accurate.



**Disclosure Purpose:** 21-05290

### Summary of Interests

I do not have any interests to disclose at this time.

### Additional Questions:

- Are there other relationships or activities that readers could perceive to have influenced, or that give the appearance of potentially influencing, what you wrote in the submitted work?**  
No.
- What is the manuscript title?**  
Phase 3 Safety and Efficacy of AZD1222 (ChAdOx1 nCoV-19) COVID-19 Vaccine
- Are you the corresponding author?**  
No.

### Certification

I certify that the information provided in this disclosure is complete and accurate.

**Disclosure Purpose:** 21-05290

Summary of Interests

I do not have any interests to disclose at this time.

Additional Questions:

- 1. **Are there other relationships or activities that readers could perceive to have influenced, or that give the appearance of potentially influencing, what you wrote in the submitted work?**  
No.
- 2. **What is the manuscript title?**  
Phase 3 Safety and Efficacy of AZD1222 (ChAdOx1 nCoV-19) COVID-19 Vaccine
- 3. **Are you the corresponding author?**  
No.

Certification

I certify that the information provided in this disclosure is complete and accurate.





**Disclosure Purpose:** 21-05290

## Summary of Interests

| Company or Organization                                                      |            |                              |
|------------------------------------------------------------------------------|------------|------------------------------|
| Entity                                                                       | Type       | Interest Held By             |
| AstraZeneca                                                                  | Employment | Self                         |
| <i>Title:</i> Statistical Science Director<br><i>Additional Information:</i> |            | <i>Position Description:</i> |
| AstraZeneca                                                                  | Stock      | Self                         |
| <i>Additional Information:</i>                                               |            |                              |

## Additional Questions:

- Are there other relationships or activities that readers could perceive to have influenced, or that give the appearance of potentially influencing, what you wrote in the submitted work?**  
No.
- What is the manuscript title?**  
Phase 3 Safety and Efficacy of AZD1222 (ChAdOx1 nCoV-19) COVID-19 Vaccine
- Are you the corresponding author?**  
No.

## Certification

I certify that the information provided in this disclosure is complete and accurate.

Disclosure Purpose: 21-05290

## Summary of Interests

### Company or Organization

| Entity                                                                                                                                                        | Type             | Interest Held By                                                                |
|---------------------------------------------------------------------------------------------------------------------------------------------------------------|------------------|---------------------------------------------------------------------------------|
| <b>Bill and Melinda Gates Foundation</b>                                                                                                                      | Grant / Contract | Other - Research grant                                                          |
| <i>Recipient Name:</i> Columbia University<br><i>Grant / Contract Description:</i> Grant to conduct HIV research<br><i>Additional Information:</i>            |                  | <i>Recipient Type:</i> Institution<br><i>Grant / Contract Purpose:</i> Research |
| <b>Gilead Sciences</b>                                                                                                                                        | Grant / Contract | Other - Research grant                                                          |
| <i>Recipient Name:</i> Columbia University<br><i>Grant / Contract Description:</i> Grant to conduct HIV prevention research<br><i>Additional Information:</i> |                  | <i>Recipient Type:</i> Institution<br><i>Grant / Contract Purpose:</i> Research |
| <b>Janssen Global Services, LLC</b>                                                                                                                           | Grant / Contract | Other - Research grant                                                          |
| <i>Recipient Name:</i> Columbia University<br><i>Grant / Contract Description:</i> Grant to conduct HIV vaccine study<br><i>Additional Information:</i>       |                  | <i>Recipient Type:</i> Institution<br><i>Grant / Contract Purpose:</i> Research |
| <b>Merck</b>                                                                                                                                                  | Grant / Contract | Other - Research grant                                                          |
| <i>Recipient Name:</i> Columbia University<br><i>Grant / Contract Description:</i> Grant to conduct HIV prevention reserach<br><i>Additional Information:</i> |                  | <i>Recipient Type:</i> Institution<br><i>Grant / Contract Purpose:</i> Research |
| <b>SANOFI PASTEUR INC.</b>                                                                                                                                    | Grant / Contract | Other - Research grant                                                          |
| <i>Recipient Name:</i> Columbia University<br><i>Grant / Contract Description:</i> Grant to conduct COVID vaccine research<br><i>Additional Information:</i>  |                  | <i>Recipient Type:</i> Institution<br><i>Grant / Contract Purpose:</i> Research |

### Additional Questions:

- Are there other relationships or activities that readers could perceive to have influenced, or that give the appearance of potentially influencing, what you wrote in the submitted work?  
No.
- What is the manuscript title?  
Phase 3 Safety and Efficacy of AZD1222 (ChAdOx1 nCoV-19) COVID-19 Vaccine
- Are you the corresponding author?  
No.

### Certification

I certify that the information provided in this disclosure is complete and accurate.

**Disclosure Purpose:** 21-05290

**Summary of Interests**

I do not have any interests to disclose at this time.

**Additional Questions:**

- 1. **Are there other relationships or activities that readers could perceive to have influenced, or that give the appearance of potentially influencing, what you wrote in the submitted work?**  
No.
- 2. **What is the manuscript title?**  
Phase 3 Safety and Efficacy of AZD1222 (ChAdOx1 nCoV-19) COVID-19 Vaccine
- 3. **Are you the corresponding author?**  
No.

**Certification**

I certify that the information provided in this disclosure is complete and accurate.



Disclosure Purpose: 21-05290

## Summary of Interests

| Company or Organization                                       |            |                                                            |
|---------------------------------------------------------------|------------|------------------------------------------------------------|
| Entity                                                        | Type       | Interest Held By                                           |
| AstraZeneca                                                   | Consultant | Self                                                       |
| <i>Category:</i> Consultant<br><i>Additional Information:</i> |            | <i>Description:</i> Statistical consultant                 |
| AstraZeneca                                                   | Consultant | Self                                                       |
| <i>Category:</i> Consultant<br><i>Additional Information:</i> |            | <i>Description:</i> Statistical consultant for AstraZeneca |

## Additional Questions:

- Are there other relationships or activities that readers could perceive to have influenced, or that give the appearance of potentially influencing, what you wrote in the submitted work?**  
No.
- What is the manuscript title?**  
Phase 3 Safety and Efficacy of AZD1222 (ChAdOx1 nCoV-19) COVID-19 Vaccine
- Are you the corresponding author?**  
No.

## Certification

I certify that the information provided in this disclosure is complete and accurate.

**Disclosure Purpose:** 21-05290

## Summary of Interests

| Company or Organization                                                                        |            |                              |
|------------------------------------------------------------------------------------------------|------------|------------------------------|
| Entity                                                                                         | Type       | Interest Held By             |
| AstraZeneca                                                                                    | Employment | Self                         |
| <i>Title:</i> Senior Global Clinical Operations Program Lead<br><i>Additional Information:</i> |            | <i>Position Description:</i> |
| AstraZeneca                                                                                    | Stock      | Self                         |
| <i>Additional Information:</i>                                                                 |            |                              |

## Additional Questions:

- Are there other relationships or activities that readers could perceive to have influenced, or that give the appearance of potentially influencing, what you wrote in the submitted work?**  
No.
- What is the manuscript title?**  
Phase 3 Safety and Efficacy of AZD1222 (ChAdOx1 nCoV-19) COVID-19 Vaccine
- Are you the corresponding author?**  
No.

## Certification

I certify that the information provided in this disclosure is complete and accurate.

**Disclosure Purpose:** 21-05290

### Summary of Interests

I do not have any interests to disclose at this time.

### Additional Questions:

- Are there other relationships or activities that readers could perceive to have influenced, or that give the appearance of potentially influencing, what you wrote in the submitted work?**  
No.
- What is the manuscript title?**  
Phase 3 Safety and Efficacy of AZD1222 (ChAdOx1 nCoV-19) COVID-19 Vaccine
- Are you the corresponding author?**  
No.

### Certification

I certify that the information provided in this disclosure is complete and accurate.

Disclosure Purpose: 21-05290

## Summary of Interests

### Company or Organization

| Entity                                                                                          | Type       | Interest Held By                                                               |
|-------------------------------------------------------------------------------------------------|------------|--------------------------------------------------------------------------------|
| <a href="#">AstraZeneca</a>                                                                     | Employment | Self                                                                           |
| <i>Title:</i> Vice President, Global Franchise Head Infection<br><i>Additional Information:</i> |            | <i>Position Description:</i> Responsible for R&D for infectious disease assets |

## Additional Questions:

1. **Are there other relationships or activities that readers could perceive to have influenced, or that give the appearance of potentially influencing, what you wrote in the submitted work?**

No.

2. **What is the manuscript title?**

Phase 3 Safety and Efficacy of AZD1222 (ChAdOx1 nCoV- 19) COVID-19 Vaccine

3. **Are you the corresponding author?**

Yes.

- a. **Please list the other authors' names here.**

Ann Falsey, Magdalena Sobieszczyk, Ian Hirsch, Stephanie Sproule, Merlin Robb, Larry Corey, Kathy Neuzil, William Hahn, Julie Hunt, Mark Mulligan, Charlene McEvoy, Edwin DeJesus, Micheal Hassman, Susan Little, Barbara Pahud, Anna Durbin, Paul Pickrell, Eric Daar, Larry Bush, Joel Solis, Quito Osuna Carr, Temitope Oyadele, Susan Buchbinder, Jessica Cowden, Sergio Vargas, Alfredo Guerrerros Benavides, Robert Call, Michael Keefer, Beth Kirkpatrick, John Pullman, Tina Tong, Margaret Brewinski Isaacs, David Benkeser, Holly Janes, Martha Nason, Justin Green, Elizabeth Kelly, Jill Maaske, Nancy Mueller, Kathryn Shoemaker, Therese Takas, Richard Marshall, Menelas N Pangalos, Tonya Villafana, Antonio Gonzalez Lopez.

## Certification

I certify that the information provided in this disclosure is complete and accurate.
